# Supplementary material for: Divalent cation effects in the glass transition of poly(diallyldimethylammonium)–poly(styrene sulfonate) polyelectrolyte complexes
Source: Royal Society of Chemistry journal article supplement (doi:10.1039/d4sm00856a), 2024-01-01
Supplement: d4sm00856a1.pdf [file d4sm00856a1.pdf]

## Electronic Supplementary information for

Divalent Cation Effects in the Glass Transition of Poly (diallyl dimethylammonium)-Poly (styrene sulfonate) Complexes

Tamunoemi Braide,<sup>1</sup> Suvesh Manoj Lalwani,<sup>1</sup> Chikaodinaka I. Eneh,<sup>1</sup> Jodie L. Lutkenhaus<sup>1,2</sup>

1. Artie McFerrin Department of Chemical Engineering, Texas A&M University, College Station, Texas 77843, United States
2. Department of Materials Science and Engineering, Texas A&M University, College Station, Texas 77840, USA

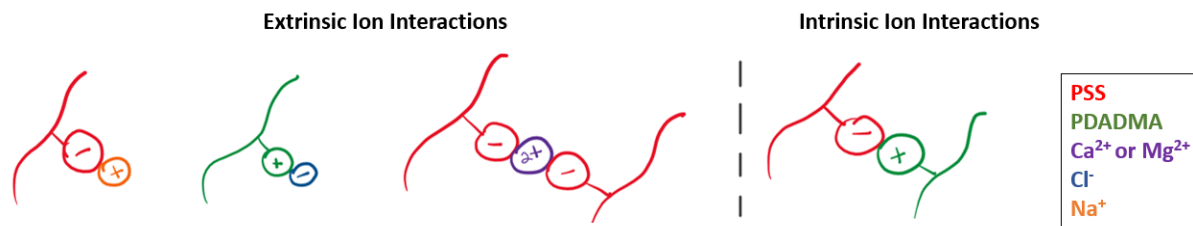

**Figure S1.** Types of interactions occurring within the PDADMA-PSS complex in the presence of NaCl, CaCl<sub>2</sub>, and MgCl<sub>2</sub>. In our system containing PDADMA and PSS in the presence of NaCl, CaCl<sub>2</sub>, and MgCl<sub>2</sub>, two distinct ion interactions are possible: extrinsic and intrinsic. Under these broad types, **Figure S1** shows the four types of ion-ion interactions that can occur.

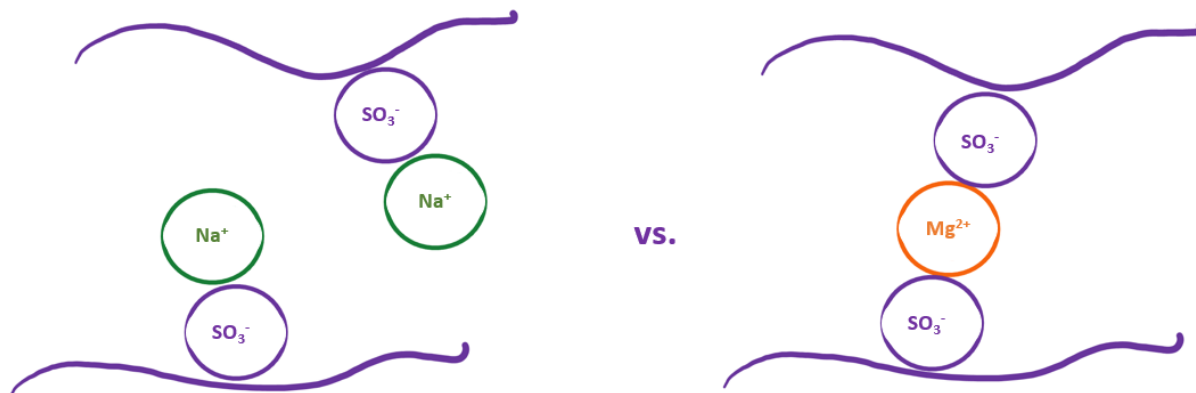

**Figure S2.** Schematic of monovalent and divalent counterion interaction with PSS chains, illustrating the formation of crosslinks in a complex when divalent cations ( $\text{Ca}^{2+}$  or  $\text{Mg}^{2+}$ ) are introduced to PDADMA/PSS polyelectrolyte assemblies. This results in a molecule with a denser structure, reduced water permeability, and increased salt retention and stability. <sup>1</sup>

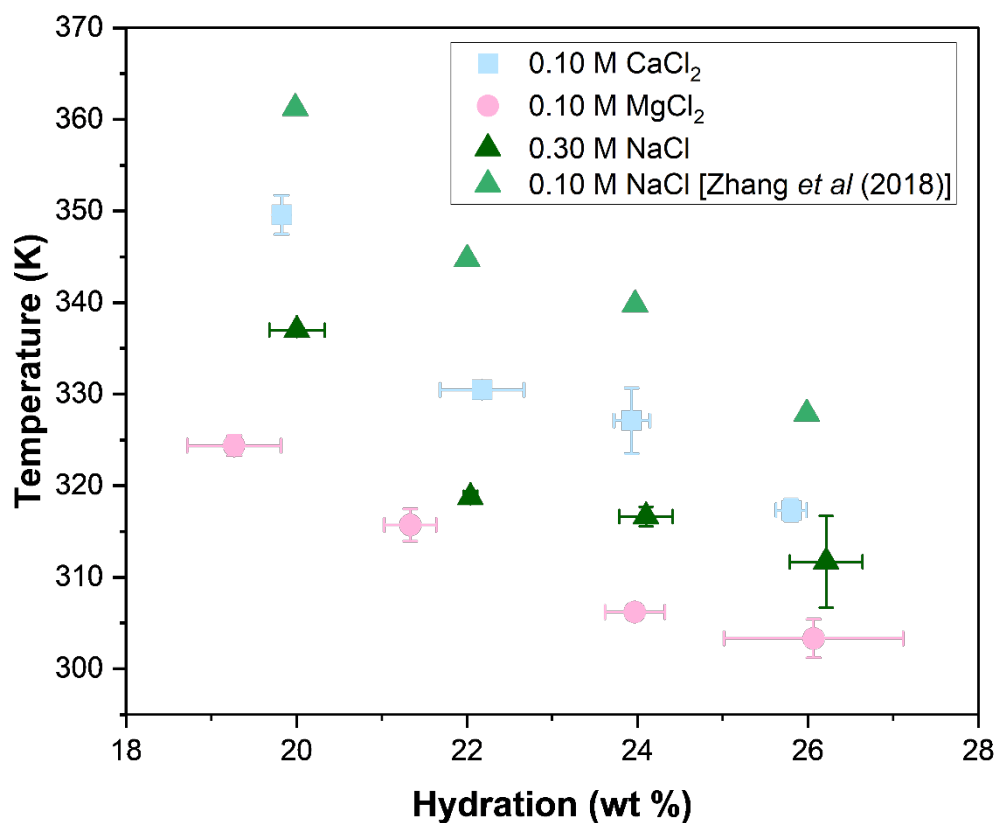

**Figure S3.** Glass transition temperatures of PDADMA-PSS PECs prepared from NaCl, CaCl<sub>2</sub>, or MgCl<sub>2</sub> solutions. The isolated PECs were rehydrated with a solution matching that of its assembly and examined using MDSC. 0.10 M NaCl reproduced with permissions from [2] "Molecular Origin of the Glass Transition in Polyelectrolyte Assemblies." By Zhang, Y.; Batys, P.; O'Neal, J. T.; Li, F.; Sammalkorpi, M.; Lutkenhaus, J. L. 2018. *ACS Central Science*, 4 (5), 638-644. Copyright (2018) American Chemical Society.



**Table S1.** Summary of compositional analysis from NAA for CaCl<sub>2</sub>-PECs

|        | Na (wt%)               | S (wt%)                | Cl (wt%)               | Ca (wt%)               | N (wt%)                |
|--------|------------------------|------------------------|------------------------|------------------------|------------------------|
| 0.03 M | 1.83E-02 ± 5.00E-04    | 9.05E+00 ±<br>6.0E-02  | 1.12E+01 ±<br>7.00E-02 | 3.96E-02 ±<br>5.00E-04 | 1.67E+01 ±<br>7.62E-02 |
| 0.10 M | 2.41E-02 ± 6.77E-03    | 1.02E+01 ±<br>2.28E+00 | 2.14E+00 ±<br>4.59E-02 | 2.07E-01 ± 5.13E-02    | 1.04E+01 ±<br>2.00E+00 |
| 0.15 M | 3.76E-02 ± 1.10E-02    | 9.91E+00 ±<br>2.74E+00 | 2.30E+00 ±<br>5.58E-02 | 1.53E+00 ± 2.15E-01    | 9.36E+00 ±<br>2.40E+00 |
| 0.20 M | 3.23E-02 ±<br>1.30E-02 | 7.98E+00 ±<br>3.26E+00 | 2.91E+00 ±<br>7.67E-02 | 1.60E+00 ± 2.70E-01    | 8.11E+00 ±<br>2.86E+00 |

**Table S2.** Summary of compositional analysis from NAA for MgCl<sub>2</sub>-PECs

|        | Na (wt%)            | S (wt%)             | Cl (wt%)            | Mg (wt%)            | N (wt%)             |
|--------|---------------------|---------------------|---------------------|---------------------|---------------------|
| 0.03 M | 1.94E-02 ± 6.00E-04 | 9.46E+00 ± 6.00E-02 | 1.04E+01 ± 9.00E-02 | 3.52E-02 ± 5.00E-04 | 1.64E+01 ± 8.84E-02 |
| 0.10 M | 2.22E-02 ± 7.60E-04 | 8.73E+00 ± 6.98E-02 | 1.38E+01 ± 6.00E-01 | 2.30E-01 ± 2.74E-03 | 1.82E+01 ± 4.78E-01 |
| 0.15 M | 3.05E-02 ± 9.40E-04 | 8.37E+00 ± 6.70E-02 | 1.75E+01 ± 8.00E-01 | 3.93E-01 ± 4.66E-03 | 2.07E+01 ± 6.35E-01 |
| 0.20 M | 2.92E-02 ± 9.73E-03 | 8.23E+00 ± 2.71E+00 | 2.54E+00 ± 6.92E-02 | 7.98E-01 ± 9.92E-02 | 8.25E+00 ± 2.37E+00 |

**Table S3.** NMR integration comparing monovalent and divalent salt in PDADMA-PSS PECs

|                                             | <b>Ratio of PSS:PDADMA in complex</b> | <b>PSS mol%</b> |
|---------------------------------------------|---------------------------------------|-----------------|
| 0.30 M NaCl - PEC                           | $0.85 \pm 0.03$                       | $46 \pm 1$      |
| 0.10 M NaCl – PEC (from ref. <sup>2</sup> ) | $0.84 \pm 0.09$                       | $46 \pm 3$      |
| 0.03 M CaCl <sub>2</sub> - PEC              | $0.88 \pm 0.03$                       | $47 \pm 1$      |
| 0.10 M CaCl <sub>2</sub> - PEC              | $0.88 \pm 0.04$                       | $48 \pm 1$      |
| 0.15 M CaCl <sub>2</sub> - PEC              | $0.88 \pm 0.04$                       | $47 \pm 1$      |
| 0.20 M CaCl <sub>2</sub> - PEC              | $0.93 \pm 0.02$                       | $48 \pm 0.5$    |
| 0.03 M MgCl <sub>2</sub> - PEC              | $0.92 \pm 0.02$                       | $48 \pm 1$      |
| 0.10 M MgCl <sub>2</sub> - PEC              | $0.87 \pm 0.04$                       | $48 \pm 0.1$    |
| 0.15 M MgCl <sub>2</sub> - PEC              | $0.86 \pm 0.03$                       | $46 \pm 1$      |
| 0.20 M MgCl <sub>2</sub> - PEC              | $0.91 \pm 0.01$                       | $48 \pm 0.2$    |



**Table S4.** Ion properties of sodium, calcium, and magnesium ion

|                                       | Na <sup>+</sup> | Ca <sup>2+</sup> | Mg <sup>2+</sup> |
|---------------------------------------|-----------------|------------------|------------------|
| Jones Dole B Coefficient <sup>3</sup> | 0.085           | 0.298            | 0.385            |
| Hydrated radius (pm) <sup>4</sup>     | 358             | 412              | 428              |
| Bare ion radius (pm) <sup>3</sup>     | 102             | 100              | 72               |
| Hydration number <sup>3</sup>         | 3.5             | 7.2              | 10               |

**Table S5.** Doping levels, composition, and the enthalpy associated with PECs prepared from different salts and concentrations.<sup>a</sup>

| Salt-concentration        | $\gamma^+$    | $\gamma^-$      | PSS: PDADMA ratio | Enthalpy (kJ/mol) |
|---------------------------|---------------|-----------------|-------------------|-------------------|
| CaCl <sub>2</sub> -0.03 M | 0.500 ± 0.004 | 0.0020 ± 0.0001 | 0.88 ± 0.03       | 9.6 ± 0.7         |
| CaCl <sub>2</sub> -0.10 M | 0.20 ± 0.03   | 0.008 ± 0.003   | 0.88 ± 0.04       | 9.5 ± 2.0         |
| CaCl <sub>2</sub> -0.15 M | 0.20 ± 0.05   | 0.060 ± 0.020   | 0.88 ± 0.04       | 11.7 ± 2.2        |
| CaCl <sub>2</sub> -0.20 M | 0.3 ± 0.1     | 0.080 ± 0.040   | 0.93 ± 0.02       | 9.6 ± 1.5         |
| MgCl <sub>2</sub> -0.03 M | 0.500 ± 0.005 | 0.0020 ± 0.0001 | 0.92 ± 0.02       | 9.4 ± 1.3         |
| MgCl <sub>2</sub> -0.10 M | 0.60 ± 0.03   | 0.0200 ± 0.0003 | 0.87 ± 0.04       | 14.9 ± 2.8        |
| MgCl <sub>2</sub> -0.15 M | 0.70 ± 0.04   | 0.0300 ± 0.0005 | 0.86 ± 0.03       | 10.3 ± 2.1        |
| MgCl <sub>2</sub> -0.20 M | 0.20 ± 0.07   | 0.060 ± 0.020   | 0.91 ± 0.01       | 12.5 ± 2.0        |

<sup>a</sup>The error in  $\gamma^+$  and  $\gamma^-$  represents the standard deviation of a minimum of three experiments. The error in the enthalpy represents the 95% confidence interval from linear fits (see **Figure 6**).

## References

- (1) Reurink, D. M.; Willott, J. D.; Roesink, H. D. W.; de Vos, W. M. Role of Polycation and Cross-Linking in Polyelectrolyte Multilayer Membranes. *ACS Applied Polymer Materials* **2020**, *2* (11), 5278-5289. DOI: 10.1021/acsapm.0c00992.
- (2) Zhang, Y.; Batys, P.; O'Neal, J. T.; Li, F.; Sammalkorpi, M.; Lutkenhaus, J. L. Molecular Origin of the Glass Transition in Polyelectrolyte Assemblies. *ACS Central Science* **2018**, *4* (5), 638-644. DOI: 10.1021/acscentsci.8b00137.
- (3) Marcus, Y. *Ion Properties*; CRC Press, 1997.
- (4) Volkov, A. G.; Paula, S.; Deamer, D. W. Two mechanisms of permeation of small neutral molecules and hydrated ions across phospholipid bilayers. *Bioelectrochemistry and Bioenergetics* **1997**, *42* (2), 153-160. DOI: [https://doi.org/10.1016/S0302-4598\(96\)05097-0](https://doi.org/10.1016/S0302-4598(96)05097-0).
